# Supplementary material
Source: Springer Nature journal article supplement (https://www.springermedizin.de/resource/supplementary/12974_2011_457_MOESM5_ESM.pdf/9601354)

□ C/EBP $\beta$  +/+    ■ C/EBP $\beta$  -/-

**A**

Protein

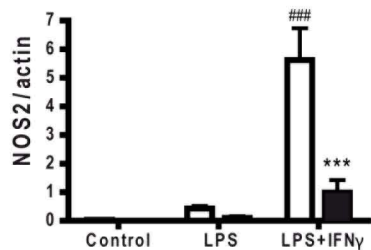

**B**

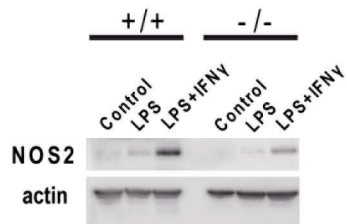

**C**

NO

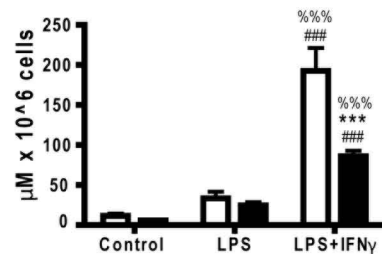

**D**

C/EBP $\beta$  +/+

C/EBP $\beta$  -/-

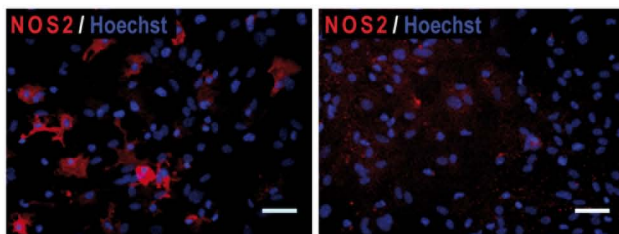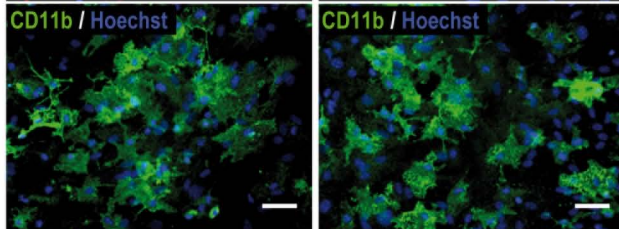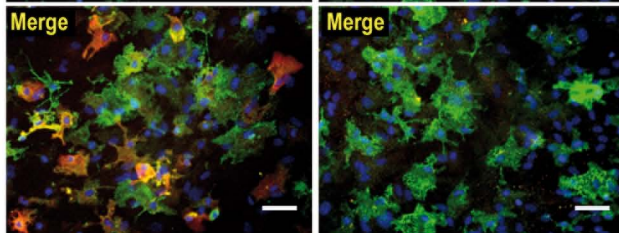

**E**

C/EBP $\beta$  +/+

C/EBP $\beta$  -/-

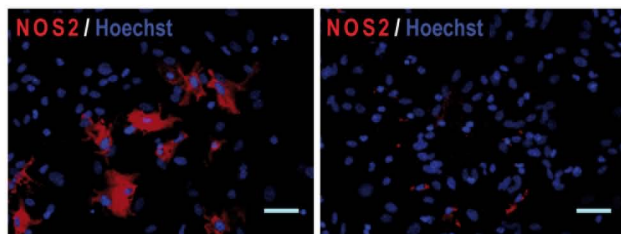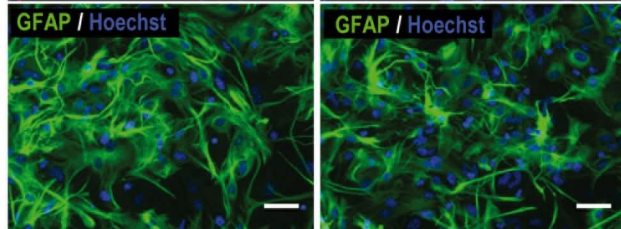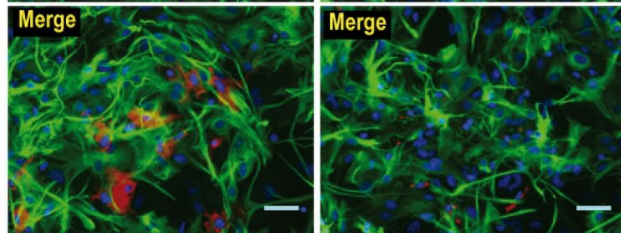

Supplement: MOESM5 [file 9601354]
